# Supplementary material for: Synergistic effect of2[V2P2O14]∞layers and hydrogen bonds inducing large birefringence in M(VO)2(PO4)2·4H2O (M = Ca, Sr, Ba) systems
Source: Royal Society of Chemistry journal article supplement (doi:10.1039/d2ce00728b), 2022-01-01

## Supporting Information

### **Synergistic effect of $^2[V_2P_2O_{14}]_\infty$ layers and hydrogen bonds inducing large birefringence in $M(VO)_2(PO_4)_2 \cdot 4H_2O$ (M = Ca, Sr, Ba) system**

Xinmei Wang<sup>a</sup>, Lu Qi<sup>a</sup>, Lei Wu<sup>a</sup>, Ruixin Zhang<sup>a</sup>, Maierhaba Abudourehman<sup>a,\*</sup>,  
Jiarong Lv<sup>a</sup>, Peng Wang<sup>a</sup>, Xiaoyu Dong<sup>b</sup>, Qun Jing<sup>a,\*</sup>, Zhaohui Chen,<sup>a,\*</sup>

<sup>a</sup>Key Laboratory of Oil & Gas Fine Chemicals, Ministry of Education and Xinjiang Uyghur Autonomous Region, School of Chemical Engineering and Technology & School of Physics and Technology, Xinjiang University, Urumqi 830046, China

<sup>b</sup>Department of Chemical and Environmental Engineering, Xinjiang Institute of Engineering, Urumqi 830091, China

\*Corresponding author: Zhaohui Chen, E-mail: [chenzhaohui@xju.edu.cn](mailto:chenzhaohui@xju.edu.cn)

## Contents

**Table S1** Atomic coordinates and equivalent isotropic displacement parameters of each atom for **1-3**.

**Table S2** Hydrogen coordinates and equivalent isotropic displacement parameters of each atom for **1-3**.

**Table S3** Selected bond distances and angles of **1-3**.

**Table S4** Hydrogen-bond interactions of **1-3**.

**Table S5** Anisotropic displacement parameters for **1-3**.

**Table S6** The calculated bond valence values of **1-3**.

**Table S7** Crystal data and structure refinement parameters for **1-3**.

**Figure S1** Experimental and calculated XRD patterns of **1-3**.

**Figure S2** Coordination environment of the M (Ca, Sr, Ba) atom in **1-3**.

**Figure S3.** The arrangement of Ca<sup>2+</sup>, Sr<sup>2+</sup>, Ba<sup>2+</sup> cations.

**Figure S4** The IR spectra of **1-3**.

**Figure S5** The UV-*vis*-NIR diffuse reflectance spectra of **1-3**.

**Figure S6** Antiparallel arrangement of VO<sub>6</sub> groups and PO<sub>4</sub> tetrahedra in the <sup>2</sup>[V<sub>2</sub>P<sub>2</sub>O<sub>14</sub>]<sub>∞</sub> layer.

**Figure S7** Band structures of **1-3**.

**Figure S8** Electron localization function diagrams of **1-3**.

**Table S1** Atomic coordinates ( $\times 10^4$ ) and equivalent isotropic displacement parameters ( $\text{\AA}^2 \times 10^3$ ) for **1-3**.

| Atom                                                                  | x        | y        | z        | U(eq) |
|-----------------------------------------------------------------------|----------|----------|----------|-------|
| <b>Ca(VO)<sub>2</sub>(PO<sub>4</sub>)<sub>2</sub>·4H<sub>2</sub>O</b> |          |          |          |       |
| V(1)                                                                  | 2892(2)  | 11014(2) | 4365(2)  | 4(1)  |
| V(2)                                                                  | -1432(2) | 6101(2)  | 2536(2)  | 4(1)  |
| P(1)                                                                  | 3215(3)  | 6101(3)  | 3499(3)  | 4(1)  |
| P(2)                                                                  | 8204(3)  | 11091(3) | 3364(3)  | 4(1)  |
| Ca(1)                                                                 | -1814(3) | 13041(2) | 8115(2)  | 8(1)  |
| O(1)                                                                  | 5844(9)  | 10786(8) | 4854(9)  | 6(1)  |
| O(2)                                                                  | 8939(9)  | 9222(8)  | 1994(9)  | 6(1)  |
| O(3)                                                                  | 2867(8)  | 4079(8)  | 5000(8)  | 5(1)  |
| O(4)                                                                  | 5606(8)  | 6421(9)  | 2112(9)  | 7(1)  |
| O(5)                                                                  | 8414(9)  | 13057(8) | 1777(8)  | 7(1)  |
| O(6)                                                                  | 9631(9)  | 11342(9) | 4884(9)  | 6(1)  |
| O(7)                                                                  | 2482(9)  | 7883(8)  | 5004(9)  | 6(1)  |
| O(8)                                                                  | 1855(9)  | 5991(9)  | 1900(9)  | 6(1)  |
| O(9)                                                                  | 1619(9)  | 11026(9) | 8146(9)  | 6(1)  |
| O(10)                                                                 | -2043(9) | 5672(9)  | 5083(9)  | 6(1)  |
| O(11)                                                                 | 3614(9)  | 11134(9) | 1840(9)  | 7(1)  |
| O(12)                                                                 | -5518(9) | 14150(8) | 8483(8)  | 6(1)  |
| O(13)                                                                 | -3407(9) | 9458(8)  | 8521(9)  | 10(1) |
| O(14)                                                                 | -530(9)  | 6450(8)  | -1257(8) | 8(1)  |
| <b>Sr(VO)<sub>2</sub>(PO<sub>4</sub>)<sub>2</sub>·4H<sub>2</sub>O</b> |          |          |          |       |
| Sr(1)                                                                 | 2396(1)  | 8094(1)  | 3843(1)  | 7(1)  |
| V(1)                                                                  | 3592(1)  | 8928(1)  | 865(1)   | 5(1)  |
| V(2)                                                                  | -1146(1) | 8878(1)  | 1766(1)  | 4(1)  |
| P(1)                                                                  | 1234(2)  | 8573(2)  | 6313(2)  | 4(1)  |
| P(2)                                                                  | 1233(2)  | 6430(2)  | 1290(2)  | 5(1)  |
| O(1)                                                                  | 2419(5)  | 7692(5)  | 7098(4)  | 6(1)  |
| O(2)                                                                  | 1975(5)  | 9511(5)  | 5540(4)  | 5(1)  |
| O(3)                                                                  | 426(5)   | 9538(5)  | 7022(4)  | 6(1)  |
| O(4)                                                                  | 144(5)   | 7537(5)  | 5593(4)  | 7(1)  |
| O(5)                                                                  | 2353(5)  | 5413(5)  | 2002(4)  | 6(1)  |
| O(6)                                                                  | -33(5)   | 5557(5)  | 590(4)   | 6(1)  |
| O(7)                                                                  | 2025(5)  | 7309(5)  | 504(4)   | 6(1)  |
| O(8)                                                                  | 615(5)   | 7464(5)  | 2064(4)  | 6(1)  |
| O(9)                                                                  | -1508(5) | 8736(5)  | 499(4)   | 10(1) |
| O(10)                                                                 | 3758(5)  | 8879(5)  | 2135(4)  | 7(1)  |
| O(11)                                                                 | 1237(5)  | 5407(5)  | 3806(4)  | 9(1)  |
| O(12)                                                                 | 4925(5)  | 6889(5)  | 3821(5)  | 10(1) |
| O(13)                                                                 | 3343(5)  | 10861(5) | 3971(4)  | 8(1)  |
| O(14)                                                                 | -512(5)  | 8967(5)  | 3621(4)  | 6(1)  |

---

| <b>Ba(VO)<sub>2</sub>(PO<sub>4</sub>)<sub>2</sub>·4H<sub>2</sub>O</b> |           |          |           |       |
|-----------------------------------------------------------------------|-----------|----------|-----------|-------|
| Ba(1)                                                                 | 6464(2)   | 7496(1)  | 9110(2)   | 12(1) |
| V(1)                                                                  | 2540(2)   | 9558(1)  | 6849(2)   | 6(1)  |
| V(2)                                                                  | 8677(2)   | 5445(1)  | 5150(2)   | 6(1)  |
| P(1)                                                                  | 7574(3)   | 10001(2) | 6851(3)   | 5(1)  |
| P(2)                                                                  | 8645(3)   | 4966(2)  | 177(3)    | 6(1)  |
| O(1)                                                                  | 6780(11)  | 4201(5)  | 32(10)    | 10(1) |
| O(2)                                                                  | 8427(15)  | 7286(7)  | 5187(15)  | 17(2) |
| O(3)                                                                  | 10599(10) | 4275(5)  | 323(12)   | 10(1) |
| O(4)                                                                  | 7763(11)  | 10701(5) | 4923(10)  | 8(1)  |
| O(5)                                                                  | 8742(13)  | 5682(6)  | -1748(11) | 9(2)  |
| O(6)                                                                  | 2510(20)  | 7671(8)  | 7161(19)  | 11(2) |
| O(7)                                                                  | 5630(12)  | 9283(6)  | 6726(13)  | 10(2) |
| O(8)                                                                  | 8451(12)  | 5707(5)  | 2049(11)  | 11(1) |
| O(9)                                                                  | 9458(11)  | 9252(5)  | 7062(11)  | 10(1) |
| O(10)                                                                 | 7440(11)  | 10755(5) | 8729(10)  | 10(1) |
| O(11)                                                                 | 2495(15)  | 10804(7) | 6739(13)  | 15(2) |
| O(12)                                                                 | 8812(14)  | 4198(7)  | 5098(14)  | 15(2) |
| O(13)                                                                 | 10460(20) | 7493(12) | 10780(20) | 17(3) |
| O(14)                                                                 | 4891(16)  | 7559(8)  | 13061(15) | 17(2) |

---

**Table S2** Hydrogen coordinates and equivalent isotropic displacement parameters of each atom for **1-3**.

| Atom                                                                  | x     | y     | z     | U(eq) |
|-----------------------------------------------------------------------|-------|-------|-------|-------|
| <b>Ca(VO)<sub>2</sub>(PO<sub>4</sub>)<sub>2</sub>·4H<sub>2</sub>O</b> |       |       |       |       |
| H(9B)                                                                 | 2138  | 12112 | 8458  | 10    |
| H(9A)                                                                 | 1472  | 9860  | 8936  | 10    |
| H(12B)                                                                | -4804 | 14575 | 7182  | 9     |
| H(12A)                                                                | -6316 | 15153 | 9216  | 9     |
| H(13A)                                                                | -3992 | 9322  | 7476  | 15    |
| H(13B)                                                                | -4485 | 9315  | 9655  | 15    |
| H(14A)                                                                | -1150 | 7485  | -1732 | 12    |
| H(14B)                                                                | 840   | 6670  | -1859 | 12    |
| <b>Sr(VO)<sub>2</sub>(PO<sub>4</sub>)<sub>2</sub>·4H<sub>2</sub>O</b> |       |       |       |       |
| H(11A)                                                                | 1804  | 5185  | 3361  | 14    |
| H(11B)                                                                | 1518  | 4981  | 4403  | 14    |
| H(12A)                                                                | 5652  | 7040  | 4335  | 16    |
| H(12B)                                                                | 5319  | 6968  | 3267  | 16    |
| H(13A)                                                                | 4183  | 10962 | 3761  | 12    |
| H(13B)                                                                | 2689  | 11479 | 3633  | 12    |
| H(14A)                                                                | -1033 | 8335  | 3915  | 9     |
| H(14B)                                                                | -581  | 9836  | 3866  | 9     |
| <b>Ba(VO)<sub>2</sub>(PO<sub>4</sub>)<sub>2</sub>·4H<sub>2</sub>O</b> |       |       |       |       |
| H(2A)                                                                 | 9605  | 7593  | 5115  | 25    |
| H(2B)                                                                 | 7722  | 7537  | 4175  | 25    |
| H(6A)                                                                 | 1495  | 7680  | 8100  | 16    |
| H(6B)                                                                 | 2967  | 7051  | 6892  | 16    |
| H(13A)                                                                | 10471 | 7956  | 11775 | 26    |
| H(13B)                                                                | 10473 | 6880  | 11292 | 26    |
| H(14A)                                                                | 4536  | 6945  | 13424 | 25    |
| H(14B)                                                                | 3915  | 8014  | 13119 | 25    |

**Table S3** Selected bond distances (Å) and angles (deg.) of **1-3**.

| <b>Ca(VO)<sub>2</sub>(PO<sub>4</sub>)<sub>2</sub>·4H<sub>2</sub>O</b> |          |                       |            |
|-----------------------------------------------------------------------|----------|-----------------------|------------|
| V(1)-O(1)                                                             | 1.992(5) | Ca(1)-O(13)           | 2.452(5)   |
| V(1)-O(3)#1                                                           | 2.016(5) | Ca(1)-O(14)#6         | 2.415(5)   |
| V(1)-O(6)#2                                                           | 2.007(6) | P(1)-O(3)             | 1.535(5)   |
| V(1)-O(7)                                                             | 2.000(6) | P(1)-O(4)             | 1.529(6)   |
| V(1)-O(9)                                                             | 2.378(6) | P(1)-O(7)             | 1.538(6)   |
| V(1)-O(11)                                                            | 1.584(6) | P(1)-O(8)             | 1.545(6)   |
| V(2)-O(2)#2                                                           | 1.987(6) | P(2)-O(1)             | 1.535(6)   |
| V(2)-O(4)#2                                                           | 1.984(5) | P(2)-O(2)             | 1.530(6)   |
| V(2)-O(5)#4                                                           | 2.037(5) | P(2)-O(5)             | 1.546(5)   |
| V(2)-O(8)                                                             | 2.004(5) | P(2)-O(6)             | 1.545(6)   |
| V(2)-O(10)                                                            | 1.606(6) | O(9)-H(9B)            | 0.827      |
| V(2)-O(14)                                                            | 2.382(5) | O(9)-H(9A)            | 0.8613     |
| Ca(1)-O(3)#1                                                          | 3.116(6) | O(12)-H(12B)          | 0.866      |
| Ca(1)-O(5)#5                                                          | 2.452(6) | O(12)-H(12A)          | 0.8916     |
| Ca(1)-O(6)#2                                                          | 2.388(6) | O(13)-H(13A)          | 0.8789     |
| Ca(1)-O(9)                                                            | 2.526(6) | O(13)-H(13B)          | 0.8513     |
| Ca(1)-O(10)#1                                                         | 2.541(6) | O(14)-H(14A)          | 0.85       |
| Ca(1)-O(12)                                                           | 2.399(6) |                       |            |
| O(1)-V(1)-O(3)#1                                                      | 88.7(2)  | O(13)-Ca(1)-O(9)      | 82.18(18)  |
| O(1)-V(1)-O(6)#2                                                      | 161.5(2) | O(13)-Ca(1)-O(10)#1   | 121.38(19) |
| O(1)-V(1)-O(7)                                                        | 88.8(2)  | O(14)#6-Ca(1)-O(3)#1  | 70.03(16)  |
| O(1)-V(1)-O(9)                                                        | 83.5(2)  | O(14)#6-Ca(1)-O(5)#5  | 69.28(18)  |
| O(3)#1-V(1)-O(9)                                                      | 74.2(2)  | O(14)#6-Ca(1)-O(9)    | 97.06(19)  |
| O(6)#2-V(1)-O(3)#1                                                    | 84.6(2)  | O(14)#6-Ca(1)-O(10)#1 | 71.78(18)  |
| O(6)#2-V(1)-O(9)                                                      | 78.1(2)  | O(14)#6-Ca(1)-O(13)   | 164.65(19) |
| O(7)-V(1)-O(3)#1                                                      | 157.1(2) | O(3)-P(1)-O(7)        | 104.2(3)   |
| O(7)-V(1)-O(6)#2                                                      | 90.7(2)  | O(3)-P(1)-O(8)        | 110.8(3)   |
| O(7)-V(1)-O(9)                                                        | 82.8(2)  | O(4)-P(1)-O(3)        | 112.6(3)   |
| O(11)-V(1)-O(1)                                                       | 99.6(3)  | O(4)-P(1)-O(7)        | 111.9(3)   |
| O(11)-V(1)-O(3)#1                                                     | 103.0(3) | O(4)-P(1)-O(8)        | 104.9(3)   |
| O(11)-V(1)-O(6)#2                                                     | 98.7(3)  | O(7)-P(1)-O(8)        | 112.6(3)   |
| O(11)-V(1)-O(7)                                                       | 99.9(3)  | O(1)-P(2)-O(5)        | 111.5(3)   |
| O(11)-V(1)-O(9)                                                       | 175.9(2) | O(1)-P(2)-O(6)        | 104.3(3)   |
| O(2)#2-V(2)-O(5)#4                                                    | 156.4(2) | O(2)-P(2)-O(1)        | 112.4(3)   |
| O(2)#2-V(2)-O(8)                                                      | 87.1(2)  | O(2)-P(2)-O(5)        | 105.8(3)   |
| O(2)#2-V(2)-O(14)                                                     | 79.4(2)  | O(2)-P(2)-O(6)        | 111.4(3)   |
| O(4)#2-V(2)-O(2)#2                                                    | 87.3(2)  | O(6)-P(2)-O(5)        | 111.5(3)   |
| O(4)#2-V(2)-O(5)#4                                                    | 86.5(2)  | P(2)-O(1)-V(1)        | 132.8(3)   |
| O(4)#2-V(2)-O(8)                                                      | 160.7(2) | P(2)-O(2)-V(2)#7      | 134.3(3)   |
| O(4)#2-V(2)-O(14)                                                     | 78.6(2)  | V(1)#8-O(3)-Ca(1)#8   | 85.58(18)  |
| O(5)#4-V(2)-O(14)                                                     | 77.1(2)  | P(1)-O(3)-V(1)#8      | 130.5(3)   |
| O(8)-V(2)-O(5)#4                                                      | 91.3(2)  | P(1)-O(3)-Ca(1)#8     | 118.8(3)   |

|                      |            |                      |           |
|----------------------|------------|----------------------|-----------|
| O(8)-V(2)-O(14)      | 82.2(2)    | P(1)-O(4)-V(2)#7     | 136.3(4)  |
| O(10)-V(2)-O(2)#2    | 105.0(3)   | V(2)#9-O(5)-Ca(1)#10 | 109.4(2)  |
| O(10)-V(2)-O(4)#2    | 101.6(3)   | P(2)-O(5)-V(2)#9     | 124.6(3)  |
| O(10)-V(2)-O(5)#4    | 98.5(2)    | P(2)-O(5)-Ca(1)#10   | 125.6(3)  |
| O(10)-V(2)-O(8)      | 97.7(3)    | V(1)#7-O(6)-Ca(1)#7  | 108.7(2)  |
| O(10)-V(2)-O(14)     | 175.6(2)   | P(2)-O(6)-V(1)#7     | 129.8(3)  |
| O(5)#5-Ca(1)-O(3)#1  | 108.21(17) | P(2)-O(6)-Ca(1)#7    | 120.2(3)  |
| O(5)#5-Ca(1)-O(9)    | 74.60(18)  | P(1)-O(7)-V(1)       | 129.3(3)  |
| O(5)#5-Ca(1)-O(10)#1 | 138.82(19) | P(1)-O(8)-V(2)       | 127.3(3)  |
| O(5)#5-Ca(1)-O(13)   | 95.90(19)  | V(1)-O(9)-Ca(1)      | 93.65(19) |
| O(6)#2-Ca(1)-O(3)#1  | 57.14(16)  | V(1)-O(9)-H(9B)      | 106.6     |
| O(6)#2-Ca(1)-O(5)#5  | 142.1(2)   | V(1)-O(9)-H(9A)      | 120.4     |
| O(6)#2-Ca(1)-O(9)    | 68.77(19)  | Ca(1)-O(9)-H(9B)     | 88.7      |
| O(6)#2-Ca(1)-O(10)#1 | 73.17(19)  | Ca(1)-O(9)-H(9A)     | 118.2     |
| O(6)#2-Ca(1)-O(12)   | 110.81(19) | H(9B)-O(9)-H(9A)     | 121.7     |
| O(6)#2-Ca(1)-O(13)   | 70.28(19)  | V(2)-O(10)-Ca(1)#8   | 144.8(3)  |
| O(6)#2-Ca(1)-O(14)#6 | 123.9(2)   | Ca(1)-O(12)-H(12B)   | 75.9      |
| O(9)-Ca(1)-O(3)#1    | 55.25(16)  | Ca(1)-O(12)-H(12A)   | 131.6     |
| O(9)-Ca(1)-O(10)#1   | 123.61(18) | H(12B)-O(12)-H(12A)  | 113.7     |
| O(10)#1-Ca(1)-O(3)#1 | 69.46(16)  | Ca(1)-O(13)-H(13A)   | 108.2     |
| O(12)-Ca(1)-O(3)#1   | 137.23(16) | Ca(1)-O(13)-H(13B)   | 109.6     |
| O(12)-Ca(1)-O(5)#5   | 102.33(18) | H(13A)-O(13)-H(13B)  | 105       |
| O(12)-Ca(1)-O(9)     | 165.92(17) | V(2)-O(14)-Ca(1)#3   | 99.9(2)   |
| O(12)-Ca(1)-O(10)#1  | 67.82(17)  | V(2)-O(14)-H(14A)    | 113.5     |
| O(12)-Ca(1)-O(13)    | 84.51(18)  | V(2)-O(14)-H(14B)    | 112.9     |
| O(12)-Ca(1)-O(14)#6  | 94.55(18)  | Ca(1)#3-O(14)-H(14A) | 113.5     |
| O(13)-Ca(1)-O(3)#1   | 120.38(17) | Ca(1)#3-O(14)-H(14B) | 112.9     |

**Sr(VO)<sub>2</sub>(PO<sub>4</sub>)<sub>2</sub>·4H<sub>2</sub>O**

|              |          |              |          |
|--------------|----------|--------------|----------|
| Sr(1)-O(2)   | 2.601(5) | V(2)-O(9)    | 1.599(6) |
| Sr(1)-O(6)#2 | 3.154(5) | V(2)-O(14)   | 2.337(5) |
| Sr(1)-O(8)   | 2.597(5) | P(1)-O(1)    | 1.544(5) |
| Sr(1)-O(9)#2 | 2.721(5) | P(1)-O(2)    | 1.540(5) |
| Sr(1)-O(10)  | 2.781(6) | P(1)-O(3)    | 1.530(5) |
| Sr(1)-O(11)  | 2.628(4) | P(1)-O(4)    | 1.533(5) |
| Sr(1)-O(12)  | 2.527(5) | P(2)-O(5)    | 1.533(5) |
| Sr(1)-O(13)  | 2.625(4) | P(2)-O(6)    | 1.532(5) |
| Sr(1)-O(14)  | 2.699(4) | P(2)-O(7)    | 1.550(6) |
| V(1)-O(2)#3  | 2.011(4) | P(2)-O(8)    | 1.533(5) |
| V(1)-O(4)#4  | 1.996(5) | O(11)-H(11A) | 0.8539   |
| V(1)-O(6)#5  | 1.990(5) | O(11)-H(11B) | 0.8501   |
| V(1)-O(7)    | 2.021(5) | O(12)-H(12A) | 0.8502   |
| V(1)-O(10)   | 1.603(6) | O(12)-H(12B) | 0.8503   |
| V(1)-O(13)#3 | 2.398(6) | O(13)-H(13A) | 0.8522   |
| V(2)-O(1)#6  | 2.010(5) | O(13)-H(13B) | 0.8664   |

|                     |            |                      |           |
|---------------------|------------|----------------------|-----------|
| V(2)-O(3)#3         | 1.993(4)   | O(14)-H(14A)         | 0.8652    |
| V(2)-O(5)#7         | 1.992(5)   | O(14)-H(14B)         | 0.8471    |
| V(2)-O(8)           | 2.014(4)   |                      |           |
| O(2)-Sr(1)-O(6)#2   | 54.59(12)  | O(5)#7-V(2)-O(1)#6   | 88.57(19) |
| O(2)-Sr(1)-O(9)#2   | 74.62(15)  | O(5)#7-V(2)-O(3)#3   | 87.77(18) |
| O(2)-Sr(1)-O(10)    | 132.97(14) | O(5)#7-V(2)-O(8)     | 160.2(2)  |
| O(2)-Sr(1)-O(11)    | 110.35(16) | O(5)#7-V(2)-O(14)    | 82.57(18) |
| O(2)-Sr(1)-O(13)    | 65.08(15)  | O(8)-V(2)-O(14)      | 77.90(19) |
| O(2)-Sr(1)-O(14)    | 70.13(14)  | O(9)-V(2)-O(1)#6     | 97.8(2)   |
| O(8)-Sr(1)-O(2)     | 132.57(14) | O(9)-V(2)-O(3)#3     | 103.4(2)  |
| O(8)-Sr(1)-O(6)#2   | 164.11(15) | O(9)-V(2)-O(5)#7     | 100.9(2)  |
| O(8)-Sr(1)-O(9)#2   | 128.97(14) | O(9)-V(2)-O(8)       | 98.7(2)   |
| O(8)-Sr(1)-O(10)    | 70.02(15)  | O(9)-V(2)-O(14)      | 176.5(2)  |
| O(8)-Sr(1)-O(11)    | 66.64(15)  | O(2)-P(1)-O(1)       | 111.7(3)  |
| O(8)-Sr(1)-O(13)    | 113.80(15) | O(3)-P(1)-O(1)       | 104.6(3)  |
| O(8)-Sr(1)-O(14)    | 62.46(15)  | O(3)-P(1)-O(2)       | 112.1(2)  |
| O(9)#2-Sr(1)-O(6)#2 | 64.23(13)  | O(3)-P(1)-O(4)       | 112.3(3)  |
| O(9)#2-Sr(1)-O(10)  | 127.91(16) | O(4)-P(1)-O(1)       | 111.7(3)  |
| O(10)-Sr(1)-O(6)#2  | 94.98(14)  | O(4)-P(1)-O(2)       | 104.6(3)  |
| O(11)-Sr(1)-O(6)#2  | 127.18(14) | O(5)-P(2)-O(7)       | 111.0(3)  |
| O(11)-Sr(1)-O(9)#2  | 62.95(15)  | O(5)-P(2)-O(8)       | 104.8(3)  |
| O(11)-Sr(1)-O(10)   | 116.68(15) | O(6)-P(2)-O(5)       | 112.4(2)  |
| O(11)-Sr(1)-O(14)   | 83.74(13)  | O(6)-P(2)-O(7)       | 105.2(3)  |
| O(12)-Sr(1)-O(2)    | 119.13(16) | O(6)-P(2)-O(8)       | 111.7(3)  |
| O(12)-Sr(1)-O(6)#2  | 67.97(14)  | O(8)-P(2)-O(7)       | 111.9(3)  |
| O(12)-Sr(1)-O(8)    | 108.19(16) | P(1)-O(1)-V(2)#2     | 128.2(3)  |
| O(12)-Sr(1)-O(9)#2  | 63.15(17)  | V(1)#1-O(2)-Sr(1)    | 107.8(2)  |
| O(12)-Sr(1)-O(10)   | 64.79(16)  | P(1)-O(2)-Sr(1)      | 114.3(2)  |
| O(12)-Sr(1)-O(11)   | 87.79(15)  | P(1)-O(2)-V(1)#1     | 129.1(3)  |
| O(12)-Sr(1)-O(13)   | 97.10(15)  | P(1)-O(3)-V(2)#1     | 135.0(3)  |
| O(12)-Sr(1)-O(14)   | 169.37(15) | P(1)-O(4)-V(1)#8     | 133.5(3)  |
| O(13)-Sr(1)-O(6)#2  | 53.33(13)  | P(2)-O(5)-V(2)#9     | 135.6(3)  |
| O(13)-Sr(1)-O(9)#2  | 117.14(15) | V(1)#10-O(6)-Sr(1)#6 | 90.42(15) |
| O(13)-Sr(1)-O(10)   | 67.93(15)  | P(2)-O(6)-Sr(1)#6    | 126.2(2)  |
| O(13)-Sr(1)-O(11)   | 174.52(16) | P(2)-O(6)-V(1)#10    | 134.0(3)  |
| O(13)-Sr(1)-O(14)   | 91.67(13)  | P(2)-O(7)-V(1)       | 127.0(3)  |
| O(14)-Sr(1)-O(6)#2  | 122.45(13) | V(2)-O(8)-Sr(1)      | 111.6(2)  |
| O(14)-Sr(1)-O(9)#2  | 117.79(15) | P(2)-O(8)-Sr(1)      | 117.3(2)  |
| O(14)-Sr(1)-O(10)   | 113.63(15) | P(2)-O(8)-V(2)       | 128.7(3)  |
| O(2)#3-V(1)-O(7)    | 90.32(18)  | V(2)-O(9)-Sr(1)#6    | 144.6(3)  |
| O(2)#3-V(1)-O(13)#3 | 78.68(18)  | V(1)-O(10)-Sr(1)     | 145.9(3)  |
| O(4)#4-V(1)-O(2)#3  | 158.1(2)   | Sr(1)-O(11)-H(11A)   | 86.7      |
| O(4)#4-V(1)-O(7)    | 88.12(19)  | Sr(1)-O(11)-H(11B)   | 110.2     |
| O(4)#4-V(1)-O(13)#3 | 79.44(19)  | H(11A)-O(11)-H(11B)  | 112.1     |



|                     |           |                     |           |
|---------------------|-----------|---------------------|-----------|
| O(6)#5-V(1)-O(2)#3  | 84.29(18) | Sr(1)-O(12)-H(12A)  | 119.5     |
| O(6)#5-V(1)-O(4)#4  | 88.7(2)   | Sr(1)-O(12)-H(12B)  | 119.1     |
| O(6)#5-V(1)-O(7)    | 157.0(2)  | H(12A)-O(12)-H(12B) | 104.5     |
| O(6)#5-V(1)-O(13)#3 | 73.18(18) | Sr(1)-O(13)-H(13A)  | 112.2     |
| O(7)-V(1)-O(13)#3   | 83.82(19) | Sr(1)-O(13)-H(13B)  | 113.1     |
| O(10)-V(1)-O(2)#3   | 99.2(2)   | V(1)#1-O(13)-Sr(1)  | 96.20(17) |
| O(10)-V(1)-O(4)#4   | 102.6(2)  | V(1)#1-O(13)-H(13A) | 112.6     |
| O(10)-V(1)-O(6)#5   | 104.6(2)  | V(1)#1-O(13)-H(13B) | 112.6     |
| O(10)-V(1)-O(7)     | 98.3(2)   | H(13A)-O(13)-H(13B) | 109.7     |
| O(10)-V(1)-O(13)#3  | 177.0(2)  | Sr(1)-O(14)-H(14A)  | 110.8     |
| O(1)#6-V(2)-O(8)    | 91.81(19) | Sr(1)-O(14)-H(14B)  | 111.3     |
| O(1)#6-V(2)-O(14)   | 81.90(19) | V(2)-O(14)-Sr(1)    | 98.69(17) |
| O(3)#3-V(2)-O(1)#6  | 158.7(2)  | V(2)-O(14)-H(14A)   | 111.4     |
| O(3)#3-V(2)-O(8)    | 84.73(18) | V(2)-O(14)-H(14B)   | 112.7     |
| O(3)#3-V(2)-O(14)   | 76.87(19) | H(14A)-O(14)-H(14B) | 111.3     |

**Ba(VO)<sub>2</sub>(PO<sub>4</sub>)<sub>2</sub>·4H<sub>2</sub>O**

|                     |           |                    |          |
|---------------------|-----------|--------------------|----------|
| Ba(1)-O(2)          | 2.819(10) | V(2)-O(5)#1        | 2.005(7) |
| Ba(1)-O(5)#1        | 2.793(7)  | V(2)-O(8)          | 2.014(7) |
| Ba(1)-O(6)          | 2.820(13) | V(2)-O(12)         | 1.598(9) |
| Ba(1)-O(7)          | 2.795(8)  | P(1)-O(4)          | 1.528(7) |
| Ba(1)-O(8)#1        | 3.218(7)  | P(1)-O(7)          | 1.546(8) |
| Ba(1)-O(9)          | 3.228(7)  | P(1)-O(9)          | 1.544(7) |
| Ba(1)-O(11)#2       | 2.823(9)  | P(1)-O(10)         | 1.541(7) |
| Ba(1)-O(12)#3       | 2.822(9)  | P(2)-O(1)          | 1.543(7) |
| Ba(1)-O(13)         | 2.766(13) | P(2)-O(3)          | 1.532(7) |
| Ba(1)-O(14)         | 2.721(10) | P(2)-O(5)          | 1.535(7) |
| V(1)-O(4)#4         | 1.996(7)  | P(2)-O(8)          | 1.532(7) |
| V(1)-O(6)           | 2.422(10) | O(2)-H(2A)         | 0.85     |
| V(1)-O(7)           | 2.007(8)  | O(2)-H(2B)         | 0.8499   |
| V(1)-O(9)#5         | 2.012(7)  | O(6)-H(6A)         | 0.8854   |
| V(1)-O(10)#6        | 2.034(7)  | O(6)-H(6B)         | 0.862    |
| V(1)-O(11)          | 1.594(9)  | O(13)-H(13A)       | 0.8687   |
| V(2)-O(1)#7         | 2.035(7)  | O(13)-H(13B)       | 0.8499   |
| V(2)-O(2)           | 2.359(9)  | O(14)-H(14A)       | 0.8499   |
| V(2)-O(3)#3         | 2.001(7)  | O(14)-H(14B)       | 0.8528   |
| O(2)-Ba(1)-O(6)     | 90.9(3)   | O(3)#3-V(2)-O(2)   | 75.8(3)  |
| O(2)-Ba(1)-O(8)#1   | 106.0(2)  | O(3)#3-V(2)-O(5)#1 | 86.3(3)  |
| O(2)-Ba(1)-O(9)     | 56.0(2)   | O(3)#3-V(2)-O(8)   | 87.5(3)  |
| O(2)-Ba(1)-O(11)#2  | 119.9(3)  | O(5)#1-V(2)-O(1)#7 | 89.2(3)  |
| O(2)-Ba(1)-O(12)#3  | 113.2(3)  | O(5)#1-V(2)-O(2)   | 80.8(3)  |
| O(5)#1-Ba(1)-O(2)   | 60.8(2)   | O(5)#1-V(2)-O(8)   | 161.5(3) |
| O(5)#1-Ba(1)-O(6)   | 116.4(3)  | O(8)-V(2)-O(1)#7   | 89.6(3)  |
| O(5)#1-Ba(1)-O(7)   | 132.1(2)  | O(8)-V(2)-O(2)     | 80.7(3)  |
| O(5)#1-Ba(1)-O(8)#1 | 47.11(19) | O(12)-V(2)-O(1)#7  | 99.7(4)  |

|                           |            |                     |          |
|---------------------------|------------|---------------------|----------|
| O(5)#1-Ba(1)-O(9)         | 100.9(2)   | O(12)-V(2)-O(2)     | 179.0(4) |
| O(5)#1-Ba(1)-O(11)#2      | 129.4(3)   | O(12)-V(2)-O(3)#3   | 103.5(4) |
| O(5)#1-Ba(1)-O(12)#3      | 73.7(2)    | O(12)-V(2)-O(5)#1   | 99.8(4)  |
| O(6)-Ba(1)-O(8)#1         | 131.7(3)   | O(12)-V(2)-O(8)     | 98.6(4)  |
| O(6)-Ba(1)-O(9)           | 107.2(3)   | O(4)-P(1)-O(7)      | 111.8(4) |
| O(6)-Ba(1)-O(11)#2        | 114.1(3)   | O(4)-P(1)-O(9)      | 111.7(4) |
| O(6)-Ba(1)-O(12)#3        | 67.8(3)    | O(4)-P(1)-O(10)     | 105.4(4) |
| O(7)-Ba(1)-O(2)           | 71.2(3)    | O(9)-P(1)-O(7)      | 105.1(4) |
| O(7)-Ba(1)-O(6)           | 61.7(3)    | O(10)-P(1)-O(7)     | 111.4(4) |
| O(7)-Ba(1)-O(8)#1         | 166.6(2)   | O(10)-P(1)-O(9)     | 111.4(4) |
| O(7)-Ba(1)-O(9)           | 47.40(19)  | O(3)-P(2)-O(1)      | 105.5(4) |
| O(7)-Ba(1)-O(11)#2        | 74.9(2)    | O(3)-P(2)-O(5)      | 111.0(4) |
| O(7)-Ba(1)-O(12)#3        | 129.5(3)   | O(3)-P(2)-O(8)      | 112.2(4) |
| O(8)#1-Ba(1)-O(9)         | 119.84(19) | O(5)-P(2)-O(1)      | 111.3(4) |
| O(11)#2-Ba(1)-O(8)#1      | 96.3(2)    | O(8)-P(2)-O(1)      | 112.0(4) |
| O(11)#2-Ba(1)-O(9)        | 64.4(2)    | O(8)-P(2)-O(5)      | 105.0(4) |
| O(12)#3-Ba(1)-O(8)#1      | 63.9(2)    | P(2)-O(1)-V(2)#9    | 127.5(4) |
| O(12)#3-Ba(1)-O(9)        | 168.8(2)   | Ba(1)-O(2)-H(2A)    | 113.6    |
| O(12)#3-Ba(1)-<br>O(11)#2 | 126.6(3)   | Ba(1)-O(2)-H(2B)    | 113.8    |
| O(13)-Ba(1)-O(2)          | 86.0(3)    | V(2)-O(2)-Ba(1)     | 97.7(3)  |
| O(13)-Ba(1)-O(5)#1        | 66.0(4)    | V(2)-O(2)-H(2A)     | 113.7    |
| O(13)-Ba(1)-O(6)          | 174.3(4)   | V(2)-O(2)-H(2B)     | 113.9    |
| O(13)-Ba(1)-O(7)          | 112.7(3)   | H(2A)-O(2)-H(2B)    | 104.5    |
| O(13)-Ba(1)-O(8)#1        | 54.0(3)    | P(2)-O(3)-V(2)#10   | 133.9(4) |
| O(13)-Ba(1)-O(9)          | 67.0(3)    | P(1)-O(4)-V(1)#11   | 133.6(4) |
| O(13)-Ba(1)-O(11)#2       | 63.8(4)    | V(2)#8-O(5)-Ba(1)#8 | 108.1(3) |
| O(13)-Ba(1)-O(12)#3       | 117.8(4)   | P(2)-O(5)-Ba(1)#8   | 108.4(4) |
| O(14)-Ba(1)-O(2)          | 173.8(3)   | P(2)-O(5)-V(2)#8    | 134.5(4) |
| O(14)-Ba(1)-O(5)#1        | 113.6(3)   | Ba(1)-O(6)-H(6A)    | 111.1    |
| O(14)-Ba(1)-O(6)          | 94.3(3)    | Ba(1)-O(6)-H(6B)    | 73.4     |
| O(14)-Ba(1)-O(7)          | 114.3(3)   | V(1)-O(6)-Ba(1)     | 96.2(4)  |
| O(14)-Ba(1)-O(8)#1        | 68.0(2)    | V(1)-O(6)-H(6A)     | 92.7     |
| O(14)-Ba(1)-O(9)          | 125.2(2)   | V(1)-O(6)-H(6B)     | 153.9    |
| O(14)-Ba(1)-O(11)#2       | 60.8(3)    | H(6A)-O(6)-H(6B)    | 113.3    |
| O(14)-Ba(1)-O(12)#3       | 65.9(3)    | V(1)-O(7)-Ba(1)     | 107.9(3) |
| O(14)-Ba(1)-O(13)         | 89.2(4)    | P(1)-O(7)-Ba(1)     | 107.8(4) |
| O(4)#4-V(1)-O(6)          | 75.7(3)    | P(1)-O(7)-V(1)      | 133.1(5) |
| O(4)#4-V(1)-O(7)          | 86.7(3)    | V(2)-O(8)-Ba(1)#8   | 136.0(3) |
| O(4)#4-V(1)-O(9)#5        | 88.2(3)    | P(2)-O(8)-Ba(1)#8   | 91.0(3)  |
| O(4)#4-V(1)-O(10)#6       | 158.9(3)   | P(2)-O(8)-V(2)      | 131.3(4) |
| O(7)-V(1)-O(6)            | 80.5(4)    | V(1)#12-O(9)-Ba(1)  | 138.0(3) |
| O(7)-V(1)-O(9)#5          | 158.6(3)   | P(1)-O(9)-Ba(1)     | 90.3(3)  |
| O(7)-V(1)-O(10)#6         | 87.4(3)    | P(1)-O(9)-V(1)#12   | 129.5(4) |

|                     |          |                     |          |
|---------------------|----------|---------------------|----------|
| O(9)#5-V(1)-O(6)    | 78.1(4)  | P(1)-O(10)-V(1)#2   | 129.6(4) |
| O(9)#5-V(1)-O(10)#6 | 90.0(3)  | V(1)-O(11)-Ba(1)#6  | 143.1(5) |
| O(10)#6-V(1)-O(6)   | 83.3(3)  | V(2)-O(12)-Ba(1)#10 | 143.4(5) |
| O(11)-V(1)-O(4)#4   | 102.2(4) | Ba(1)-O(13)-H(13A)  | 106.5    |
| O(11)-V(1)-O(6)     | 177.4(4) | Ba(1)-O(13)-H(13B)  | 98.9     |
| O(11)-V(1)-O(7)     | 101.0(4) | H(13A)-O(13)-H(13B) | 110.2    |
| O(11)-V(1)-O(9)#5   | 100.4(4) | Ba(1)-O(14)-H(14A)  | 109      |
| O(11)-V(1)-O(10)#6  | 98.8(4)  | Ba(1)-O(14)-H(14B)  | 109.4    |
| O(1)#7-V(2)-O(2)    | 81.0(3)  | H(14A)-O(14)-H(14B) | 115      |
| O(3)#3-V(2)-O(1)#7  | 156.8(3) |                     |          |

Symmetry transformations used to generate equivalent atoms:

**Ca(VO)<sub>2</sub>(PO<sub>4</sub>)<sub>2</sub>·4H<sub>2</sub>O**

|                 |                  |                 |                 |
|-----------------|------------------|-----------------|-----------------|
| # 1 x, y+1, z   | # 2 x-1, y, z    | # 3 x, y-1, z-1 | # 4 x-1, y-1, z |
| # 5 x-1, y, z+1 | # 6 x, y+1, z+1  | # 7 x+1, y, z   | # 8 x, y-1, z   |
| # 9 x+1, y+1, z | # 10 x+1, y, z-1 |                 |                 |

**Sr(VO)<sub>2</sub>(PO<sub>4</sub>)<sub>2</sub>·4H<sub>2</sub>O**

|                     |                          |                     |                          |
|---------------------|--------------------------|---------------------|--------------------------|
| # 1 x, -y+2, z+1/2  | # 2 x+1/2, -y+3/2, z+1/2 | # 3 x, -y+2, z-1/2  | # 4 x+1/2, -y+3/2, z-1/2 |
| # 5 x+1/2, y+1/2, z | # 6 x-1/2, -y+3/2, z-1/2 | # 7 x-1/2, y+1/2, z | # 8 x-1/2, -y+3/2, z+1/2 |
| # 9 x+1/2, y-1/2, z | # 10 x-1/2, y-1/2, z     |                     |                          |

**Ba(VO)<sub>2</sub>(PO<sub>4</sub>)<sub>2</sub>·4H<sub>2</sub>O**

|                        |                         |                         |                        |
|------------------------|-------------------------|-------------------------|------------------------|
| # 1 x, y, z+1          | # 2 x+1/2, -y+2, z+1/2  | # 3 x-1/2, -y+1, z+1/2  | # 4 x-1/2, -y+2, z+1/2 |
| # 5 x-1, y, z          | # 6 x-1/2, -y+2, z-1/2  | # 7 x+1/2, -y+1, z+1/2  | # 8 x, y, z-1          |
| # 9 x-1/2, -y+1, z-1/2 | # 10 x+1/2, -y+1, z-1/2 | # 11 x+1/2, -y+2, z-1/2 | # 12 x+1, y, z         |

**Table S4** Hydrogen-bond interactions of **1-3**.

| D-H...A                                                               | d(D-H) | d(H...A) | d(D...A)  | <(DHA) |
|-----------------------------------------------------------------------|--------|----------|-----------|--------|
| <b>Ca(VO)<sub>2</sub>(PO<sub>4</sub>)<sub>2</sub>·4H<sub>2</sub>O</b> |        |          |           |        |
| O(9)-H(9B)...O(12)#7                                                  | 0.83   | 1.97     | 2.751(7)  | 156.1  |
| O(9)-H(9A)...O(2)#5                                                   | 0.86   | 2.19     | 2.770(7)  | 124.7  |
| O(12)-H(12B)...O(10)#1                                                | 0.87   | 1.98     | 2.758(8)  | 149.4  |
| O(12)-H(12A)...O(8)#11                                                | 0.89   | 1.92     | 2.717(8)  | 148    |
| O(13)-H(13A)...O(1)#2                                                 | 0.88   | 1.93     | 2.665(8)  | 140.7  |
| O(13)-H(13B)...O(11)#5                                                | 0.85   | 2.02     | 2.718(8)  | 138.9  |
| O(14)-H(14A)...O(13)#12                                               | 0.85   | 1.88     | 2.663(7)  | 152.7  |
| O(14)-H(14B)...O(7)#12                                                | 0.85   | 2.11     | 2.732(8)  | 129.7  |
| <b>Sr(VO)<sub>2</sub>(PO<sub>4</sub>)<sub>2</sub>·4H<sub>2</sub>O</b> |        |          |           |        |
| O(11)-H(11A)...O(5)                                                   | 0.85   | 1.9      | 2.676(8)  | 150.4  |
| O(11)-H(11B)...O(6)#11                                                | 0.85   | 2.29     | 2.863(7)  | 124.8  |
| O(12)-H(12A)...O(7)#2                                                 | 0.85   | 1.85     | 2.692(7)  | 168.9  |
| O(12)-H(12B)...O(3)#4                                                 | 0.85   | 2.1      | 2.740(8)  | 131.2  |
| O(13)-<br>H(13A)...O(11)#5                                            | 0.85   | 1.91     | 2.683(6)  | 150.9  |
| O(13)-H(13B)...O(1)#3                                                 | 0.87   | 2.07     | 2.720(7)  | 131    |
| O(14)-H(14B)...O(12)#7                                                | 0.85   | 1.9      | 2.661(6)  | 148    |
| <b>Ba(VO)<sub>2</sub>(PO<sub>4</sub>)<sub>2</sub>·4H<sub>2</sub>O</b> |        |          |           |        |
| O(2)-H(2A)...O(6)#12                                                  | 0.85   | 2.27     | 2.936(15) | 135.3  |
| O(2)-H(2B)...O(14)#8                                                  | 0.85   | 1.94     | 2.655(10) | 140.8  |
| O(6)-H(6A)...O(13)#5                                                  | 0.89   | 1.85     | 2.669(10) | 152.6  |
| O(6)-H(6B)...O(1)#3                                                   | 0.86   | 2.13     | 2.792(12) | 133    |
| O(13)-H(13B)...O(8)#1                                                 | 0.85   | 2.04     | 2.744(16) | 140.1  |
| O(14)-H(14A)...O(3)#13                                                | 0.85   | 2.09     | 2.791(13) | 139.7  |
| O(14)-H(14B)...O(10)#4                                                | 0.85   | 1.88     | 2.698(12) | 161.4  |

Symmetry transformations used to generate equivalent atoms:

**Ca(VO)<sub>2</sub>(PO<sub>4</sub>)<sub>2</sub>·4H<sub>2</sub>O**

# 1 x, y+1, z      # 2 x-1, y, z      # 3 x, y-1, z-1      # 4 x-1, y-1, z  
# 5 x-1, y, z+1      # 6 x, y+1, z+1      # 7 x+1, y, z      # 8 x, y-1, z  
# 9 x+1, y+1, z      # 10 x+1, y, z-1      # 11 x-1, y+1, z+1      # 12 x, y, z-1

**Sr(VO)<sub>2</sub>(PO<sub>4</sub>)<sub>2</sub>·4H<sub>2</sub>O**

# 1 x, -y+2, z+1/2      # 2 x+1/2, -y+3/2, z+1/2      # 3 x, -y+2, z-1/2      # 4 x+1/2, -y+3/2, z-1/2  
# 5 x+1/2, y+1/2, z      # 6 x-1/2, -y+3/2, z-1/2      # 7 x-1/2, y+1/2, z      # 8 x-1/2, -y+3/2, z+1/2  
# 9 x+1/2, y-1/2, z      # 10 x-1/2, y-1/2, z      # 11 x, -y+1, z+1/2

**Ba(VO)<sub>2</sub>(PO<sub>4</sub>)<sub>2</sub>·4H<sub>2</sub>O**

# 1 x, y, z+1      # 2 x+1/2, -y+2, z+1/2      # 3 x-1/2, -y+1, z+1/2      # 4 x-1/2, -y+2, z+1/2  
# 5 x-1, y, z      # 6 x-1/2, -y+2, z-1/2      # 7 x+1/2, -y+1, z+1/2      # 8 x, y, z-1  
# 9 x-1/2, -y+1, z-1/2      # 10 x+1/2, -y+1, z-1/2      # 11 x+1/2, -y+2, z-1/2      # 12 x+1, y, z  
# 13 x-1/2, -y+1, z+3/2

**Table S5** Anisotropic displacement parameters ( $\text{\AA}^2 \times 10^3$ ) for **1-3**.

| Atom                                                                  | U11   | U22   | U33   | U23   | U13   | U12   |
|-----------------------------------------------------------------------|-------|-------|-------|-------|-------|-------|
| <b>Ca(VO)<sub>2</sub>(PO<sub>4</sub>)<sub>2</sub>·4H<sub>2</sub>O</b> |       |       |       |       |       |       |
| V(1)                                                                  | 4(1)  | 4(1)  | 4(1)  | -1(1) | -1(1) | 1(1)  |
| V(2)                                                                  | 5(1)  | 3(1)  | 4(1)  | 0(1)  | -2(1) | 0(1)  |
| Ca(1)                                                                 | 10(1) | 7(1)  | 8(1)  | -2(1) | -5(1) | 2(1)  |
| P(1)                                                                  | 4(1)  | 3(1)  | 4(1)  | 1(1)  | -1(1) | 0(1)  |
| P(2)                                                                  | 4(1)  | 3(1)  | 4(1)  | -1(1) | -1(1) | 0(1)  |
| O(1)                                                                  | 6(3)  | 8(3)  | 6(2)  | 0(2)  | -3(2) | 1(2)  |
| O(2)                                                                  | 10(3) | 3(2)  | 5(3)  | 1(2)  | 1(2)  | 0(2)  |
| O(3)                                                                  | 6(3)  | 4(2)  | 6(3)  | -1(2) | -4(2) | 3(2)  |
| O(4)                                                                  | 3(3)  | 8(3)  | 8(3)  | 1(2)  | -1(2) | -1(2) |
| O(5)                                                                  | 10(3) | 4(2)  | 4(3)  | 2(2)  | 0(2)  | 2(2)  |
| O(6)                                                                  | 4(2)  | 7(2)  | 7(2)  | -4(2) | 0(2)  | 3(2)  |
| O(7)                                                                  | 11(3) | 3(2)  | 4(2)  | -2(2) | 0(2)  | 1(2)  |
| O(8)                                                                  | 4(3)  | 8(2)  | 5(2)  | 0(2)  | -2(2) | 0(2)  |
| O(9)                                                                  | 7(2)  | 6(2)  | 5(2)  | 0(1)  | -1(1) | -3(1) |
| O(10)                                                                 | 6(3)  | 6(3)  | 6(3)  | 0(2)  | -2(2) | 1(2)  |
| O(11)                                                                 | 10(3) | 6(2)  | 8(3)  | -1(2) | -6(2) | 3(2)  |
| O(12)                                                                 | 9(3)  | 5(2)  | 4(2)  | 0(2)  | -1(2) | -1(2) |
| O(13)                                                                 | 12(3) | 7(2)  | 8(2)  | 1(2)  | 1(2)  | 4(2)  |
| O(14)                                                                 | 7(3)  | 8(2)  | 9(3)  | -2(2) | -2(2) | 5(2)  |
| <b>Sr(VO)<sub>2</sub>(PO<sub>4</sub>)<sub>2</sub>·4H<sub>2</sub>O</b> |       |       |       |       |       |       |
| Sr(1)                                                                 | 7(1)  | 6(1)  | 8(1)  | -1(1) | 1(1)  | 0(1)  |
| V(1)                                                                  | 5(1)  | 3(1)  | 5(1)  | 0(1)  | 1(1)  | 1(1)  |
| V(2)                                                                  | 4(1)  | 3(1)  | 5(1)  | 0(1)  | 1(1)  | 1(1)  |
| P(1)                                                                  | 4(1)  | 4(1)  | 5(1)  | 1(1)  | 0(1)  | 0(1)  |
| P(2)                                                                  | 5(1)  | 3(1)  | 6(1)  | 0(1)  | 2(1)  | -1(1) |
| O(1)                                                                  | 7(2)  | 4(2)  | 7(2)  | -1(2) | 0(2)  | 2(2)  |
| O(2)                                                                  | 7(2)  | 3(2)  | 6(2)  | -1(2) | 1(2)  | -3(2) |
| O(3)                                                                  | 5(2)  | 6(2)  | 8(3)  | 2(2)  | 2(2)  | 2(2)  |
| O(4)                                                                  | 7(2)  | 5(2)  | 9(3)  | -1(2) | 0(2)  | -3(2) |
| O(5)                                                                  | 6(2)  | 5(2)  | 8(3)  | 0(2)  | 3(2)  | 1(2)  |
| O(6)                                                                  | 5(2)  | 7(2)  | 7(3)  | -1(2) | 2(2)  | -4(2) |
| O(7)                                                                  | 7(2)  | 3(2)  | 8(3)  | -1(2) | 1(2)  | -2(2) |
| O(8)                                                                  | 5(2)  | 4(2)  | 8(2)  | -1(2) | 1(2)  | 0(2)  |
| O(9)                                                                  | 8(2)  | 9(2)  | 12(3) | 0(2)  | 2(2)  | 0(2)  |
| O(10)                                                                 | 8(2)  | 8(2)  | 6(3)  | -2(2) | 0(2)  | -1(2) |
| O(11)                                                                 | 9(2)  | 11(2) | 8(3)  | 3(2)  | 2(2)  | 1(2)  |
| O(12)                                                                 | 10(2) | 11(3) | 9(3)  | 0(2)  | 1(2)  | 1(2)  |
| O(13)                                                                 | 4(2)  | 7(2)  | 13(3) | 1(2)  | 3(2)  | 3(2)  |
| O(14)                                                                 | 9(2)  | 3(2)  | 7(2)  | -2(2) | 2(2)  | 0(2)  |
| <b>Ba(VO)<sub>2</sub>(PO<sub>4</sub>)<sub>2</sub>·4H<sub>2</sub>O</b> |       |       |       |       |       |       |
| Ba(1)                                                                 | 13(1) | 11(1) | 12(1) | 0(1)  | 1(1)  | 2(1)  |
| V(1)                                                                  | 5(1)  | 7(1)  | 5(1)  | 1(1)  | 0(1)  | 1(1)  |

|       |       |       |       |       |       |       |
|-------|-------|-------|-------|-------|-------|-------|
| V(2)  | 6(1)  | 6(1)  | 4(1)  | 0(1)  | 1(1)  | 1(1)  |
| P(1)  | 4(1)  | 7(1)  | 5(1)  | 0(1)  | -1(1) | -1(1) |
| P(2)  | 6(1)  | 6(1)  | 4(1)  | 0(1)  | 1(1)  | 0(1)  |
| O(1)  | 8(3)  | 9(3)  | 15(4) | -2(3) | 1(3)  | 0(2)  |
| O(2)  | 13(4) | 22(5) | 15(4) | 5(3)  | -6(3) | 1(3)  |
| O(3)  | 9(4)  | 10(3) | 10(4) | 1(3)  | 0(3)  | -1(2) |
| O(4)  | 10(4) | 7(3)  | 8(3)  | 3(2)  | 0(3)  | -1(3) |
| O(5)  | 17(4) | 8(3)  | 3(3)  | 0(3)  | 2(3)  | 3(3)  |
| O(6)  | 16(5) | 5(4)  | 11(4) | 1(3)  | 6(3)  | -2(3) |
| O(7)  | 4(4)  | 13(4) | 14(5) | 4(3)  | 0(3)  | -3(3) |
| O(8)  | 14(4) | 11(3) | 7(3)  | 2(3)  | 0(3)  | 1(3)  |
| O(9)  | 10(4) | 11(3) | 10(4) | 1(3)  | -3(3) | 0(3)  |
| O(10) | 15(4) | 8(3)  | 7(3)  | 2(2)  | 3(3)  | -2(3) |
| O(11) | 18(5) | 10(4) | 17(5) | 1(3)  | 1(4)  | 4(3)  |
| O(12) | 13(5) | 15(4) | 17(4) | 1(3)  | -1(4) | -1(3) |
| O(13) | 19(5) | 8(4)  | 25(6) | -1(3) | -2(4) | -3(3) |
| O(14) | 26(5) | 8(4)  | 16(4) | 0(4)  | -2(3) | -1(4) |

---

**Table S6** The calculated bond valence values of **1-3**.

| <b>Ca(VO)<sub>2</sub>(PO<sub>4</sub>)<sub>2</sub>·4H<sub>2</sub>O</b> |        |        |        |        |        |
|-----------------------------------------------------------------------|--------|--------|--------|--------|--------|
| Atom                                                                  | Ca(1)  | V(1)   | V (2)  | P (1)  | P (2)  |
|                                                                       | 1.9463 | 4.1188 | 4.0435 | 4.7979 | 4.7690 |
| Atom                                                                  | O (1)  | O (2)  | O (3)  | O (4)  | O (5)  |
|                                                                       | 1.7750 | 1.7991 | 1.7840 | 1.8071 | 1.9440 |
| Atom                                                                  | O (6)  | O (7)  | O (8)  | O (9)  | O (10) |
|                                                                       | 2.0404 | 1.7531 | 1.7247 | 1.8159 | 1.8298 |
| Atom                                                                  | O(11)  | O(12)  | O(13)  | O(14)  |        |
|                                                                       | 1.7169 | 1.5660 | 1.5753 | 1.8070 |        |
| <b>Sr(VO)<sub>2</sub>(PO<sub>4</sub>)<sub>2</sub>·4H<sub>2</sub>O</b> |        |        |        |        |        |
| Atom                                                                  | Sr(1)  | V(1)   | V (2)  | P (1)  | P (2)  |
|                                                                       | 2.0136 | 4.057  | 4.1096 | 4.7978 | 4.7950 |
| Atom                                                                  | O (1)  | O (2)  | O (3)  | O (4)  | O (5)  |
|                                                                       | 1.7189 | 2.0130 | 1.7898 | 1.7754 | 1.7815 |
| Atom                                                                  | O (6)  | O (7)  | O (8)  | O (9)  | O (10) |
|                                                                       | 1.8487 | 1.6841 | 2.0226 | 1.8447 | 1.7976 |
| Atom                                                                  | O(11)  | O(12)  | O(13)  | O(14)  |        |
|                                                                       | 1.5486 | 1.6407 | 1.7468 | 1.6900 |        |
| <b>Ba(VO)<sub>2</sub>(PO<sub>4</sub>)<sub>2</sub>·4H<sub>2</sub>O</b> |        |        |        |        |        |
| Atom                                                                  | Ba(1)  | V(1)   | V (2)  | P (1)  | P (2)  |
|                                                                       | 2.2194 | 3.9935 | 3.9966 | 4.7561 | 4.8172 |
| Atom                                                                  | O (1)  | O (2)  | O (3)  | O (4)  | O (5)  |
|                                                                       | 1.6867 | 1.7637 | 1.7711 | 1.7886 | 2.0121 |
| Atom                                                                  | O (6)  | O (7)  | O (8)  | O (9)  | O (10) |
|                                                                       | 1.7741 | 1.9746 | 1.8351 | 1.7965 | 1.6931 |
| Atom                                                                  | O(11)  | O(12)  | O(13)  | O(14)  |        |
|                                                                       | 1.9022 | 1.8906 | 1.5877 | 1.6027 |        |



**Table S7** Crystal data and structure refinement parameters for **1-3**.

|                                                                                                                      |                                                                          |                                                                       |                                                                       |
|----------------------------------------------------------------------------------------------------------------------|--------------------------------------------------------------------------|-----------------------------------------------------------------------|-----------------------------------------------------------------------|
| Empirical formula                                                                                                    | Ca(VO <sub>2</sub> (PO <sub>4</sub> ) <sub>2</sub> ·4H <sub>2</sub> O    | Sr(VO <sub>2</sub> (PO <sub>4</sub> ) <sub>2</sub> ·4H <sub>2</sub> O | Ba(VO <sub>2</sub> (PO <sub>4</sub> ) <sub>2</sub> ·4H <sub>2</sub> O |
| Formula weight                                                                                                       | 435.965                                                                  | 483.50                                                                | 533.22                                                                |
| Crystal system,                                                                                                      | Triclinic,                                                               | Monoclinic,                                                           | Monoclinic                                                            |
| Space group                                                                                                          | <i>P1</i>                                                                | <i>Cc</i>                                                             | <i>Pc</i>                                                             |
| <i>a</i> (Å)                                                                                                         | 6.3369(5)                                                                | 9.0039(3)                                                             | 6.3867(8)                                                             |
| <i>b</i> (Å)                                                                                                         | 6.3410(5)                                                                | 8.9895(3)                                                             | 12.7855(16)                                                           |
| <i>c</i> (Å)                                                                                                         | 6.5675(6)                                                                | 12.7798(5)                                                            | 6.3889(8)                                                             |
| Unit cell dimensions                                                                                                 | $\alpha = 85.84^\circ$<br>$\beta = 73.14^\circ$<br>$\gamma = 89.9^\circ$ | $\beta = 110.4^\circ$                                                 | $\beta = 90.165^\circ$                                                |
| Volume [Å <sup>3</sup> ], <i>Z</i>                                                                                   | 251.84(4), 1                                                             | 1017.39(6), 4                                                         | 521.70(11), 2                                                         |
| $\rho_{\text{calcd}}$ (Mg/m <sup>3</sup> )                                                                           | 2.875                                                                    | 3.157                                                                 | 3.394                                                                 |
| $\mu$ [mm <sup>-1</sup> ]                                                                                            | 2.768                                                                    | 7.423                                                                 | 5.877                                                                 |
| F(000)                                                                                                               | 216                                                                      | 936                                                                   | 504                                                                   |
| Crystal size [mm <sup>3</sup> ]                                                                                      | 0.15 × 0.14 × 0.10                                                       | 0.15 × 0.12 × 0.11                                                    | 0.07 × 0.05 × 0.02                                                    |
| Theta range for data collection [°]                                                                                  | 3.229 to 29.561                                                          | 3.229 to 29.514                                                       | 3.187 to 27.385                                                       |
| Limiting indices                                                                                                     | -8 ≤ <i>h</i> ≤ 8,<br>-8 ≤ <i>k</i> ≤ 8,<br>-8 ≤ <i>l</i> ≤ 8            | -11 ≤ <i>h</i> ≤ 11,<br>-11 ≤ <i>k</i> ≤ 10,<br>-15 ≤ <i>l</i> ≤ 16   | -8 ≤ <i>h</i> ≤ 7,<br>-11 ≤ <i>k</i> ≤ 16,<br>-8 ≤ <i>l</i> ≤ 8       |
| Reflections collected / unique                                                                                       | 10713/ 2444<br>[ <i>R</i> <sub>int</sub> = 0.0436]                       | 4090/ 2053<br>[ <i>R</i> <sub>int</sub> = 0.0323]                     | 3164/ 2123<br>[ <i>R</i> <sub>int</sub> = 0.0187]                     |
| Completeness [%]                                                                                                     | 98.9 %                                                                   | 99.9 %                                                                | 99.5 %                                                                |
| Data / restraints / parameters                                                                                       | 2444 / 9 / 172                                                           | 2053 / 28 / 173                                                       | 2123 / 8 / 193                                                        |
| Goodness-of-fit on <i>F</i> <sub>o</sub> <sup>2</sup>                                                                | 1.075                                                                    | 1.032                                                                 | 1.047                                                                 |
| Final <i>R</i> indices [ <i>F</i> <sub>o</sub> <sup>2</sup> > 2σ( <i>F</i> <sub>o</sub> <sup>2</sup> )] <sup>a</sup> | <i>R</i> <sub>1</sub> = 0.0393,<br><i>wR</i> <sub>2</sub> = 0.1027       | <i>R</i> <sub>1</sub> = 0.0295,<br><i>wR</i> <sub>2</sub> = 0.0656    | <i>R</i> <sub>1</sub> = 0.0249,<br><i>wR</i> <sub>2</sub> = 0.0530    |
| <i>R</i> indices (all data) <sup>a</sup>                                                                             | <i>R</i> <sub>1</sub> = 0.0406,<br><i>wR</i> <sub>2</sub> = 0.1040       | <i>R</i> <sub>1</sub> = 0.0303,<br><i>wR</i> <sub>2</sub> = 0.0651    | <i>R</i> <sub>1</sub> = 0.0306,<br><i>wR</i> <sub>2</sub> = 0.0557    |
| Absolute structure parameter                                                                                         | 0.038(17)                                                                | 0.456 (11)                                                            | 0.23(4)                                                               |
| Extinction coefficient                                                                                               | 0.011(5)                                                                 | 0.00824(19)                                                           | 0.0068(8)                                                             |
| Largest diff. peak and hole [e·Å <sup>-3</sup> ]                                                                     | 1.434 and -0.798                                                         | 0.640 and -0.749                                                      | 0.506 and -0.502                                                      |

$$^a R_1 = \sum(|F_o| - |F_c|) / \sum|F_o| \text{ and } wR_2 = [\sum w(F_o^2 - F_c^2)^2 / \sum wF_o^4]^{1/2} \text{ for } F_o^2 > 2\sigma(F_o^2)$$

**Figure S1** Experimental and calculated XRD patterns of (a) **1**; (b) **2** and (c) **3**.

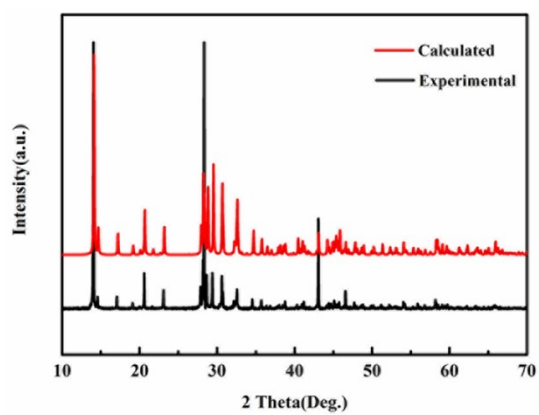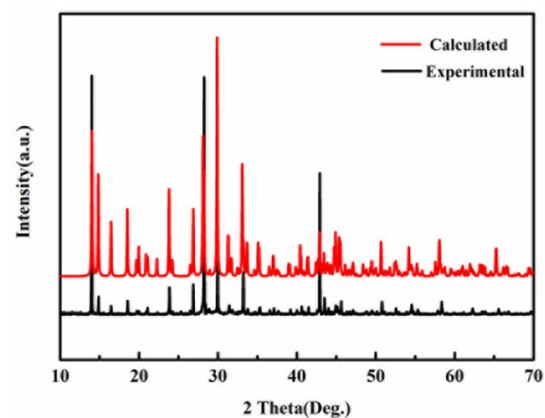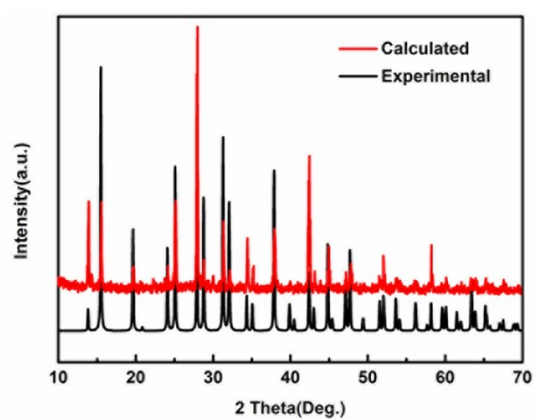

|     |     |
|-----|-----|
| (a) | (b) |
| (c) |     |

**Figure S2** Coordination environment of the M (Ca, Sr, Ba) atom in **1-3**.

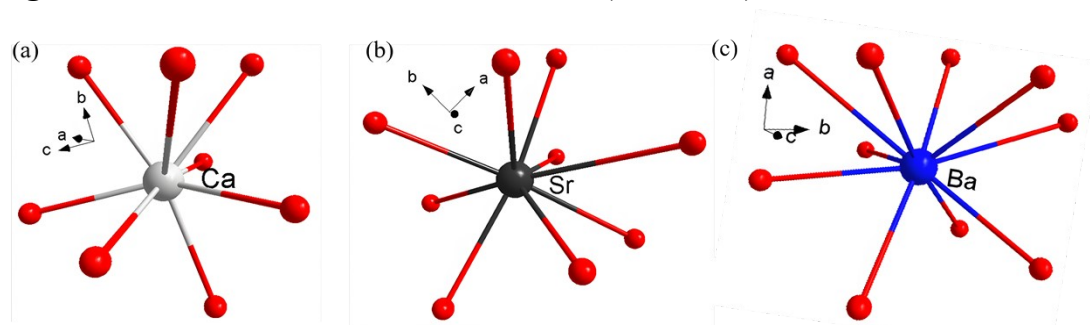

**Figure S3** The arrangement of (a)  $\text{Ca}^{2+}$  cations; (b)  $\text{Sr}^{2+}$  cations and (c)  $\text{Ba}^{2+}$  cations.

$\text{Sr}^{2+}$

**Figure S4** The IR spectra of (a) **1**; (b) **2** and (c) **3**.

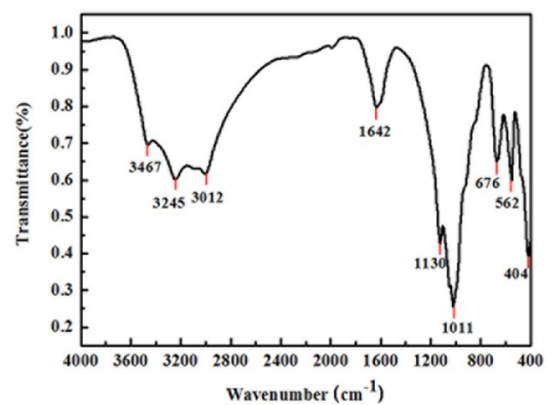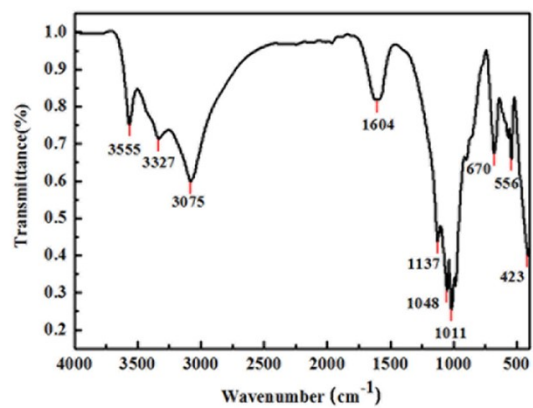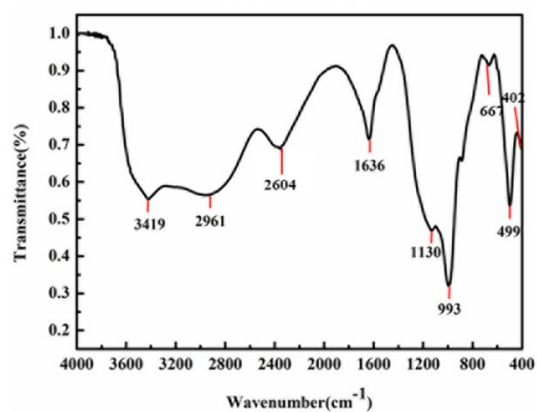

|     |     |
|-----|-----|
| (a) | (b) |
| (c) |     |

**Figure S5** The UV-*vis*-NIR diffuse reflectance spectra of (a) **1**; (b) **2** and (c) **3**.

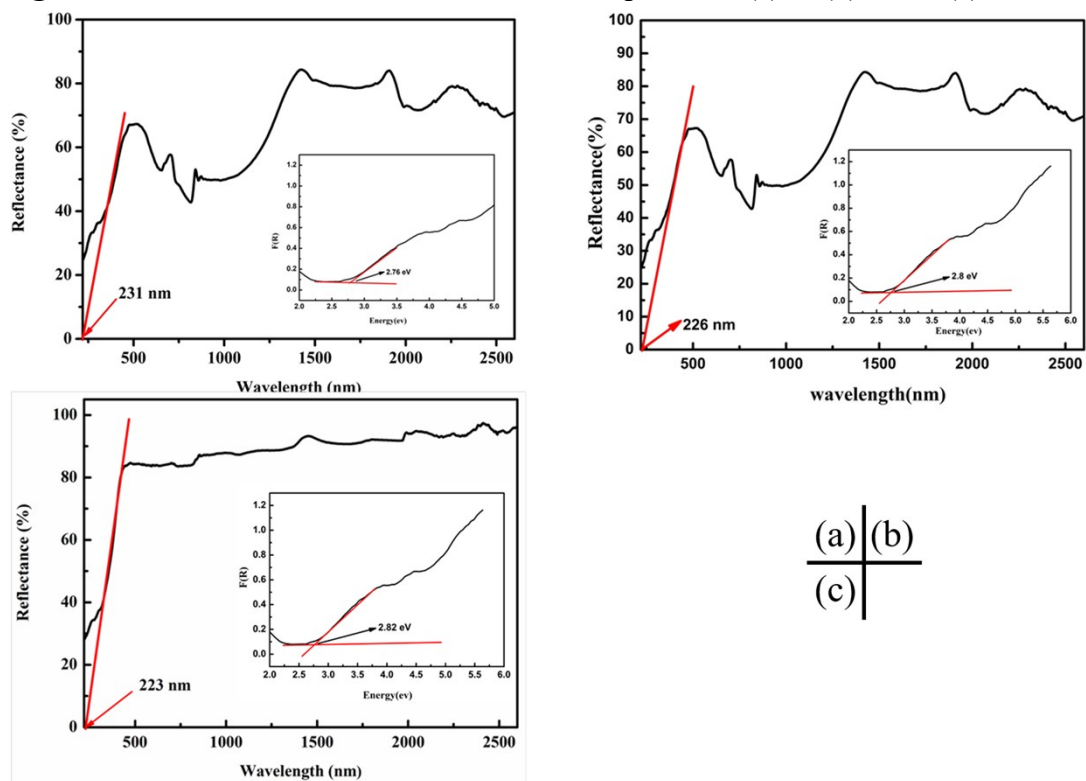

(a) | (b)  
-----  
(c) |

**Figure S6** Antiparallel arrangement of  $\text{VO}_6$  groups and  $\text{PO}_4$  tetrahedra in the  ${}^2[\text{V}_2\text{P}_2\text{O}_{14}]_\infty$  layer. (A layer in **1** and **2**, B and C layers in **3**)

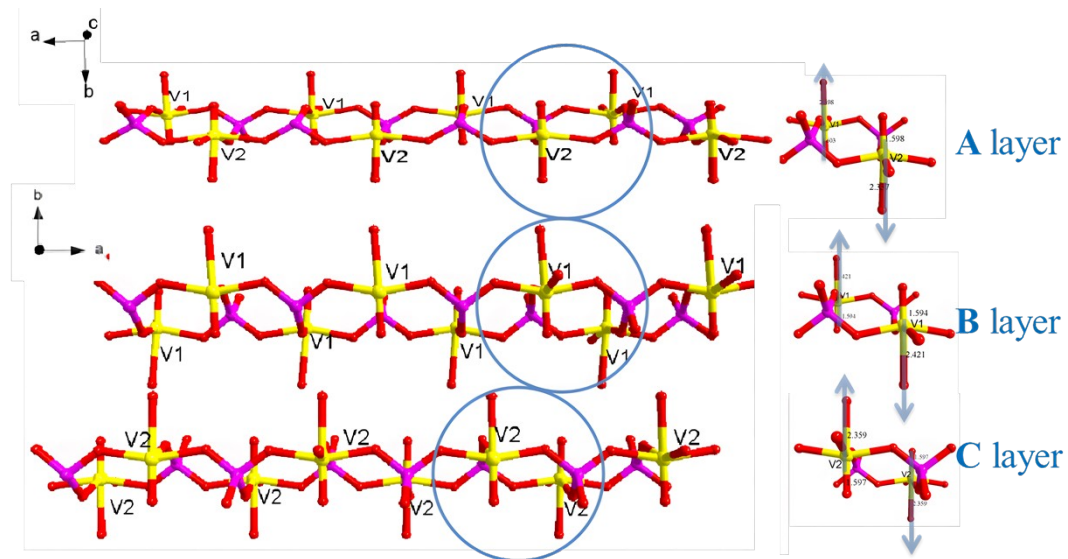

**Figure S7** Band structures of (a) **1**; (b) **2** and (c) **3**.

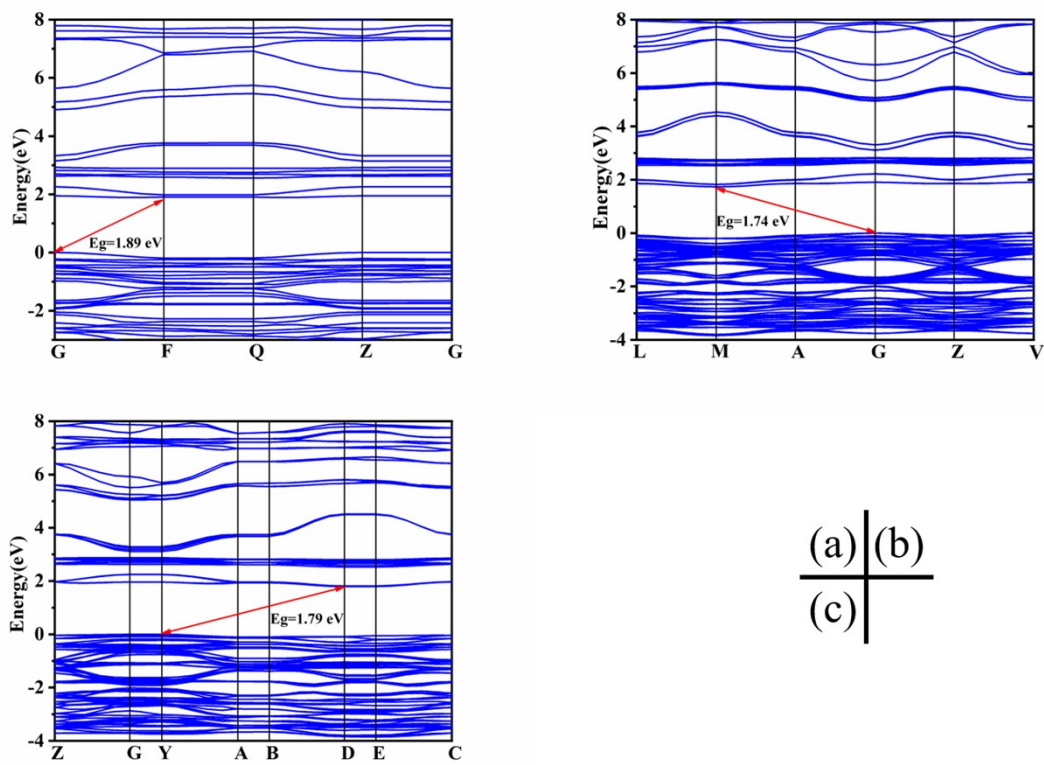

|     |     |
|-----|-----|
| (a) | (b) |
| (c) |     |

**Figure S8** Electron localization function diagrams of (a) **1**; (b) **2** and (c) **3**.

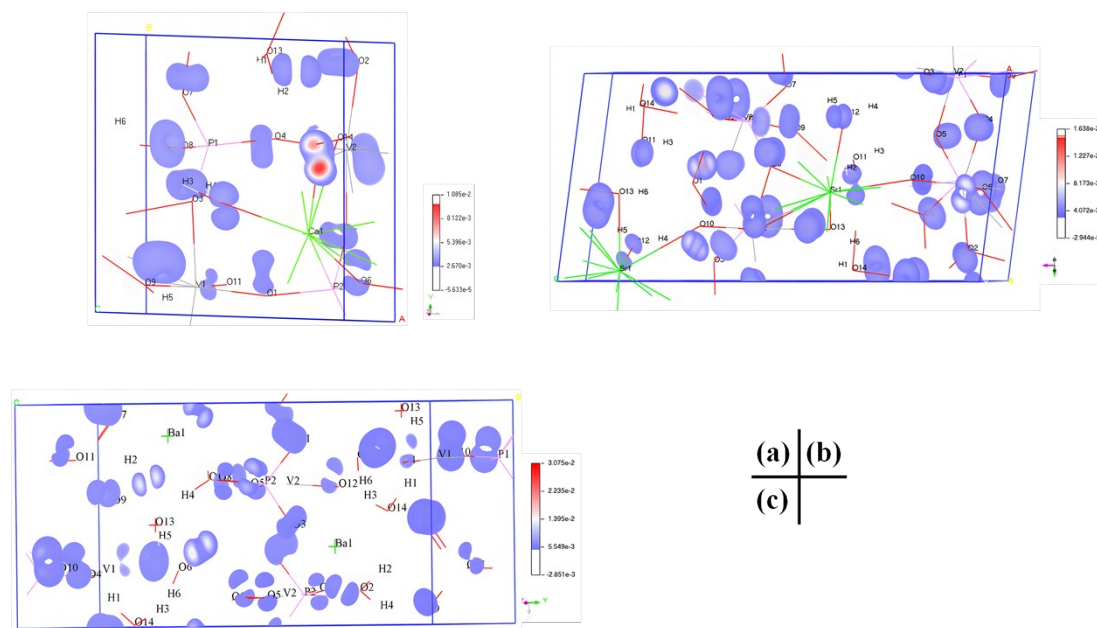

Supplement: d2ce00728b1.pdf [file d2ce00728b1.pdf]
